1 The soluble glutathione transferase superfamily: Role of Mu  
2 class in Triclabendazole sulphoxide challenge in *Fasciola*  
3 *hepatica*

4 Rebekah B. Stuart<sup>1,2</sup>, Suzanne Zwaanswijk<sup>1</sup>, Neil D. MacKintosh<sup>1</sup>, Boontarikaan  
5 Witikornkul<sup>1</sup>, Mark Prescott<sup>3</sup>, Peter M. Brophy<sup>1</sup> & Russell M. Morpew<sup>1</sup>

6 <sup>1</sup>Institute of Biological, Environmental and Rural Sciences, Aberystwyth University,  
7 Aberystwyth, Ceredigion, Wales. SY23 3DA

8 <sup>2</sup>Hybu Cig Cymru, Aberystwyth, Ceredigion, Wales. SY23 3FF.

9 <sup>3</sup>School of Biological Sciences, University of Liverpool, Liverpool, Merseyside, England, UK

10 Corresponding author: Dr R Morpew. Institute of Biological, Environmental and Rural  
11 Sciences (IBERS) Aberystwyth University, Aberystwyth, Wales. SY23 3DA.

12 Email: [rom@aber.ac.uk](mailto:rom@aber.ac.uk)

13 Tel: +44(0)1970 622314

14 Fax: +44(0)1970 622350

15

16 Running title: *F. hepatica* GST response to TCBZ-SO Treatment (46 characters)

17

18 Keywords: Proteomics; Affinity chromatography

19

## 20 **Abstract**

21 *Fasciola hepatica* (liver fluke), a significant threat to food security, causes global  
22 economic loss for the livestock production industry and is re-emerging as a food  
23 borne disease of humans. In the absence of vaccines the commonly used method of  
24 treatment control is by anthelmintics; with only Triclabendazole (TCBZ) currently  
25 effective against all stages of *F. hepatica* in livestock and humans. There is  
26 widespread resistance to TCBZ and detoxification by flukes might contribute to the  
27 mechanism. However, there is limited Phase I capacity in adult parasitic helminths  
28 and the major Phase II detoxification system in adults is the soluble Glutathione  
29 transferases (GST) superfamily. Previous global proteomic studies have shown that  
30 the levels of Mu class GST from pooled *F. hepatica* parasites respond under TCBZ-  
31 Sulphoxide (TCBZ-SO), the likely active metabolite, challenge during *in vitro* culture  
32 ex-host. We have extended this finding by using a sub-proteomic lead approach to  
33 measure the change in the total soluble GST profile (GST-ome) of individual TCBZ  
34 susceptible *F. hepatica* on TCBZ-SO-exposure *in vitro* culture. TCBZ-SO exposure  
35 demonstrated a FhGST-Mu29 and FhGST-Mu26 response following affinity  
36 purification using both GSH and S-hexyl GSH affinity resins. Furthermore, a low  
37 affinity Mu class GST (FhGST-Mu5) has been identified and recombinantly  
38 expressed and represents a novel low affinity mu class GST. Low affinity GST  
39 isoforms within the GST-ome was not limited to FhGST-Mu5 with second likely low  
40 affinity sigma class GST (FhGST-S2) uncovered through genome analysis. This  
41 study represents the most complete *Fasciola* GST-ome generated to date and has  
42 supported the sub proteomic analysis on individual adult flukes.

43

## 44 **Introduction**

45 Fasciolosis, caused by the trematode liver flukes *Fasciola hepatica* and *F. gigantica*,  
46 is a foodborne zoonotic affecting grazing animals and humans worldwide (Andrews  
47 1999). Liver fluke cause economic losses of over US\$3 billion worldwide per annum  
48 to livestock via a decrease in production of milk, meat and wool, susceptibility to  
49 other infections, condemnation of livers, and mortality (Boray 1997). There are no  
50 commercial vaccines as yet available with Triclabendazole (TCBZ) currently the  
51 most commonly used fasciolicide due to activity against both adults and juvenile  
52 stage fluke (Brennan, Fairweather et al. 2007). TCBZ is absorbed in the rumen and

53 passes through the blood to the liver where it is rapidly oxidised to the likely main  
54 active metabolites; Triclabendazole-sulphoxide (TCBZ-SO) (Alvarez, Solana et al.  
55 2005) and Triclabendazole sulphone (TCBZ-SO<sub>2</sub>) (Alvarez, Solana et al. 2005;  
56 Alvarez, Moreno et al. 2009). Unfortunately, TCBZ resistant liver fluke are wide  
57 spread, with resistance first encountered in Australia; but it is now evident in  
58 Western Europe (Brennan, Fairweather et al. 2007) including the UK (Thomas,  
59 Coles et al. 2000).

60 At present our understanding of the mode of action and detoxification of TCBZ is  
61 fragmented and mechanisms underpinning resistance may need to be resolved in  
62 order to measure early TCBZ resistance in populations and thus preserve efficacy  
63 (Brennan, Fairweather et al. 2007). To this end, the glutathione transferase (GST)  
64 superfamily have been identified as the major Phase II detoxification system present  
65 in all parasitic helminths. GSTs have been implicated in both drug metabolism and  
66 resistance in other groups of organisms e.g. insects and human tumours (Hayes and  
67 Pulford 1995). Eight cytosolic GST classes have been identified across kingdoms;  
68 namely Alpha, Mu, Pi, Sigma, Theta, Kappa, Zeta, and Omega (Cvilinear, Lamka et al.  
69 2009). In *F. hepatica* GSTs belonging to four classes have been revealed by  
70 biochemistry and bioinformatics; Omega ( $\omega$ ), Mu ( $\mu$ ), Sigma ( $\sigma$ ) and Zeta ( $\zeta$ )  
71 (Chemale, Morphew et al. 2006; Morphew, Eccleston et al. 2012). Chemale *et al.*  
72 (2010) further reported that Mu class GST levels vary, with Mu class GST-1 reduced  
73 in abundance while Mu class GST-26 increased in TCBZ resistant and susceptible  
74 *F. hepatica* under TCBZ sulphoxide (TCBZ-SO) exposure. In addition, Scarcella *et al.*  
75 (2012) identified that fluke resistant to TCBZ expressed significantly higher levels  
76 of GST activity compared to susceptible flukes. Furthermore, an amino acid mutation  
77 in Mu Class GST-26 has been linked to a TCBZ resistant liver fluke strain  
78 (Fernandez, Estein et al. 2015). However, to date, there has not been a robust sub-  
79 proteomic study that compared the expression of GST isotypes in individual liver  
80 fluke under TCBZ-SO stress. Thus, we purified GSTs from the cytosol of single adult  
81 flukes using a combination of Glutathione (GSH) and S-Hexyl-GSH agarose,  
82 resolved GST isotypes by 2-DE and identified individual GSTs by MS/MS with the  
83 support of genomic and transcriptomic databases. As a consequence we have  
84 identified a novel Mu, Sigma and Omega class GST designated FhGST-Mu5,  
85 FhGST-S2 and FhGST-O2 respectively. FhGST-Mu5 has been cloned and  
86 expressed in a recombinant and active form and characterised.

87

88

## 89 **Materials and Methods**

### 90 ***In vitro* TCBZ culture**

91 Individual liver fluke from natural infections were collected and exposed to TCBZ-SO  
92 as described previously (Morphew, MacKintosh et al. 2014). In brief, live adult *F.*  
93 *hepatica* were collected from a local abattoir (Randall Parker Foods, Llanidloes,  
94 Wales, UK) and washed in PBS at 37°C. Fluke were washed for 1 h with PBS  
95 replacement every 15 mins. Post-washes, replicates of 10 adult, sized matched,  
96 worms were placed into fluke Dulbecco's Modified Eagle Medium (DMEM) culture  
97 media containing 15 mM HEPES, 61 mM glucose, 2.2 mM Calcium acetate, 2.7 mM  
98 Magnesium sulphate, 1 µM serotonin and gentamycin (5 µg/ml) as previously  
99 described (Morphew, Wright et al. 2011). Flukes were maintained in culture at 37°C  
100 for 2 h (including transport to the laboratory) to establish a baseline protein  
101 expression profile. Upon completion of the initial 2 h incubation, culture media was  
102 replaced and supplemented with TCBZ-SO (LGC Standards, UK) at 50 µg/ml (Lethal  
103 dose) or 15 µg/ml (Sub-lethal dose) in DMSO (final conc. 0.1% v/v). For control  
104 samples only DMSO was added to a final volume of 0.1% v/v. Fluke cultures were  
105 then allowed to incubate at 37°C for a 6 h time period after which the media was  
106 refreshed, with DMSO and TCBZ-SO as required. Fluke cultures were incubated at  
107 37°C for a further 6 h. A final refreshment of culture media was conducted and fluke  
108 cultures incubated for an additional 12 h at 37°C. Upon completion of the culture  
109 fluke were removed from the media and snap frozen individually in liquid N<sub>2</sub>. All  
110 samples were stored at -80°C until required.

111

112

### 113 **GST Assay and Purification**

114 Individual adult *F. hepatica* were homogenised in an all-glass homogeniser on ice  
115 using 2 ml of lysis buffer containing 20 mM Potassium Phosphate pH 7.4, 0.1% v/v  
116 Triton-X 100 and EDTA-free protease inhibitors (Roche, Complete-Mini, EDTA-free).  
117 Samples were centrifuged at 100,000 x *g* for 45 minutes at 4°C to obtain the  
118 supernatant, the cytosolic fraction. Protein levels were quantified by the method of  
119 Bradford (1976). GST enzymatic specific activity was determined according to the

120 conditions outlined by Habig *et al.* (1974) described previously (LaCourse, Perally et  
121 al. 2012) and stored at -80°C until needed. Specific activity data was log<sub>10</sub>  
122 transformed prior to statistical comparison carried out by a two way ANOVA.

123

124 Cytosolic proteins were applied to a GSH-agarose (Sigma-Aldrich) or an S-hexyl-  
125 GSH-agarose (Sigma-Aldrich) affinity matrix and purified at 4°C according to the  
126 manufacturer's instructions and as described previously (Morphew, Eccleston et al.  
127 2012). Eluted proteins were concentrated using 10-kDa molecular weight cut off  
128 filters (Amicon Ultra, Millipore) and washed with ddH<sub>2</sub>O. All samples were quantified  
129 again by the method of Bradford (Sigma-Aldrich).

130

### 131 **Protein Preparation and 2-DE**

132 IPG strips (7 cm, linear pH 3-10) were rehydrated with 100 µl of buffer (containing 8  
133 M Urea, 2% w/v CHAPS, 33 mM DTT, 0.5% ampholytes pH range 3-10) plus 25 µl  
134 of sample protein and ddH<sub>2</sub>O to load 20 µg of GSH or Hexyl-GSH affinity bound  
135 proteins. Samples were in-gel rehydrated for 16 hrs and isoelectrically focused on 7  
136 cm pH 3-10 IPG strips to 10,000 Vh on a Protean® IEF Cell (BioRad). After  
137 focusing, strips were then equilibrated for 15 min in reducing equilibration buffer  
138 (30% v/v glycerol, 6 M urea, 1% DTT) followed by 15 min in alkylating equilibration  
139 buffer (30% v/v glycerol, 6 M urea, 4% iodoacetamide). IPG strips were run upon  
140 SDS PAGE (12.5% acrylamide) using the Protean® II 2-D Cell (BioRad). Gels were  
141 then Coomassie blue stained (Phastgel Blue R, Amersham, Biosciences), and  
142 imaged on a GS 800 calibrated densitometer (BioRad). Quantitative differences  
143 between 2-DE protein spots were analysed using Progenesis PG220, software  
144 version 200 (Nonlinear Dynamics Ltd.), using 5 biological replicates. Spots were  
145 automatically detected on gels and manually edited. Normalisation of spots was  
146 calculated using total spot volume multiplied by the total volume (Moxon, LaCourse  
147 et al. 2010). All gel images were warped using manual matching before average gels  
148 (5 gels were used to make the average gels) for each treatment group were  
149 produced. Unmatched protein spots were also detected on appropriate gel  
150 comparisons. Two-fold differences between protein spots with a p<0.05 were  
151 considered significant when average gels were compared.

152

## 153 **Western Blotting**

154 Following 2-DE, resolved proteins were transferred to nitrocellulose membranes.  
155 The nitrocellulose membrane was soaked in ddH<sub>2</sub>O for 1 minute. The gel,  
156 membrane, filter paper and porous pads were equilibrated in 1X Western Blot  
157 Transfer Buffer (NuPAGE Transfer Buffer, Life Technologies) for 20 min.

158

159 Proteins were transferred at 40 V for 2 h in 1 X Western blot transfer buffer (50 ml  
160 NuPage transfer Buffer, 850 ml ddH<sub>2</sub>O, 100 ml Methanol). To ensure proteins were  
161 transferred, the membrane was removed and stained with Amido black staining  
162 solution (0.1% w/v Amido black, 10% v/v Acetic Acid, 25% v/v isopropanol) for 1 min  
163 to detect the success of the transfer. The membrane was then washed with ddH<sub>2</sub>O.  
164 The membrane was then placed in Amido black de-stain (25% v/v isopropanol and  
165 10% v/v acetic acid) for 30 mins. The membrane was imaged using the GS-800  
166 calibrated densitometer (BioRad). Amido black stain was removed with several  
167 washes of Tris buffered saline, 1% v/v Tween 20 (TTBS).

168

169 The nitrocellulose membrane was blocked in blocking buffer (TTBS + 5% milk  
170 powder) overnight. The membrane was then washed with TTBS and then incubated  
171 with the primary antibody for 1-2 h. A 1:5,000 dilution and a 1:30,000 antibody  
172 dilution in blocking buffer was used for anti-Mu and anti-Sigma GST respectively.  
173 After incubation with the primary antibody the membrane was washed in TBS for 10  
174 min. The membrane was washed twice more before incubating with the secondary  
175 antibody (Anti-goat IgG raised in rabbits for the Mu and Anti-rabbit IgG raised in  
176 goats for the Sigma) for 1-2 hours at a 1:30000 dilution in blocking buffer. The  
177 membrane was then washed 3 times in Tris buffered saline (TBS). Interacting spots  
178 or bands were detected using the 5-Bromo-4-chloro-3-indolyl phosphate (BCIP) in  
179 conjugation with Nitro blue tetrazolium (NBT), according to manufactures  
180 instructions. To develop, a 1:2 solution of BCIP:NBT in substrate buffer consisting of  
181 0.1 M tris, 100 mM NaCl and 5 mM magnesium chloride, adjusted to pH 9.5. To  
182 cease the over development, membranes were rinsed in ddH<sub>2</sub>O. Blots were then  
183 scanned with a GS-800 calibrated densitometer (BioRad) and were imaged using  
184 Quantity One Version 4.6 software (BioRad, U.K.).

185

## 186 **Protein Identification**

187 Protein spots were manually excised from the gels and in-gel digested with trypsin  
188 according to the method of Chemale *et al.* (2006). Tandem mass spectrometry  
189 (MSMS) were performed according to the method described by Moxon *et al.* (2010).  
190 Briefly, selected peptides from peptide digests were loaded onto a gold coated  
191 nanovial (Waters, UK), and sprayed at 800 – 900 V at atmospheric pressure and  
192 fragmented by collision induced dissociation using argon as the collision gas. Mass  
193 Lynx v 3.5 (Waters, UK) ProteinLynx was used to process the fragmentation spectra.  
194 Each fragmented spectrum was individually processed as follows; each spectrum  
195 was combined and smoothed twice using the SavitzkyGolay method  $\pm$  3 channels,  
196 background subtraction (polynomial order 15 and 10% below the curve). Each  
197 spectrum was exported and spectra common to each 2-DE spot were merged into a  
198 single MASCOT generic format (.mgf) file using the online peak list conversion utility  
199 available at [www.proteomecommons.org](http://www.proteomecommons.org) (Falkner, Falkner et al. 2007).

200

## 201 **Mass Spectrometry Database Analysis**

202 Merged files were submitted to MASCOT MSMS ion search set to search the  
203 published *F. hepatica* genomes (Cwiklinski, Dalton et al. 2015; McNulty, Tort et al.  
204 2017) using the webpage interface (MatrixScience). The following parameters were  
205 selected for each peptide search; enzyme set at trypsin with one missed cleavage  
206 allowed, fixed modifications set for carbamidomethylation with variable modifications  
207 considered for oxidation of methionine, monoisotopic masses with unrestricted  
208 protein masses were considered, peptide and fragment mass tolerance were set at  $\pm$   
209 1.2 Da and 0.6 Da respectively for an ESI QUAD-TDF instrument (Moxon, LaCourse  
210 et al. 2010).

211

## 212 ***In silico* investigation of *Fasciola* transcripts and *F. hepatica* genome**

213 Sequences representing known GST classes were obtained from NCBI  
214 (<http://www.ncbi.nlm.nih.gov/>). A mammalian and a helminth GST sequence were  
215 selected for each GST class where available. GST sequences were used to  
216 tBLASTn the *F. hepatica* transcriptome (Young, Hall et al. 2010) and the *F. gigantica*  
217 transcriptome (Young, Jex et al. 2011) both available to search at  
218 (<http://bioinfosecond.vet.unimelb.edu.au/wblast2.html>). A second *F. hepatica*

219 transcriptome database (EBI-ENA archive ERP000012: an initial characterization of  
220 the *F. hepatica* transcriptome using 454-FLX sequencing) was also used to search  
221 against. *In silico* investigation of the known GST sequences and positive transcript  
222 hit were blasted against genome sequencing project of *F. hepatica* (Cwiklinski,  
223 Dalton et al. 2015). Transcript expression levels for individual GST isoforms were  
224 analysed from Cwiklinski *et al.* (2018). Each specific GST isoform was used to  
225 BLASTp the transcriptome to identify the respective expression level.

226

### 227 **Cloning of newly identified genes**

228 PCR amplification was carried out on an Applied Biosystems 96 Well Thermal  
229 Cycler. PCR of cDNA was performed using MyFi Taq (Bioline) following the  
230 manufacturer's instructions. Standard thermocycler conditions involved an initial  
231 denaturation at 95°C for two minutes, followed by 25-35 cycles of denaturation  
232 (95°C, 30 seconds), annealing (Gradient temperature specific for each gene of  
233 interest, 30 seconds) and extension (72°C, 30-90 seconds), before a final extension  
234 at 72°C for five minutes and holding period at 4°C until products removed. Primers  
235 were based on the scaffolds from the *F. hepatica* genome (FhGST-S2 For:  
236 GGGCGATACTATCTATCAACGT Rev: GTGCGACTGACTTTGAATC; FhGST-O2  
237 For: CACACAGCTGGAATTGA TTA Rev: TAATATTGACGGATCCAAACA). PCR  
238 products were ligated into pGEM-T-Easy, according to the manufacturer's protocol  
239 and sequenced in house. Sequences were translated using Expasy Translate  
240 (<https://web.expasy.org/translate/>) and molecular weight and pI calculated using  
241 Expasy Compute pI/Mw ([https://web.expasy.org/compute\\_pi/](https://web.expasy.org/compute_pi/)). GST domains were  
242 predicted using PFam (El-Gebali, Mistry et al. 2019).

243

### 244 **Protein sequence alignment and phylogenetic tree construction**

245 All sequences were aligned using ClustalW through BioEdit Version 7.0.5.3  
246 (10/28/05) (Hall 1999). To construct a phylogenetic tree an alignment of all GST  
247 sequences was exported into Molecular Evolutionary Genetics Analysis (MEGA)  
248 software version 4.0 (Tamura, Dudley et al. 2007). Analysis was performed using a  
249 neighbour-joining method, 1000-replicate, bootstrapped tree. The amino acid data  
250 were corrected for a gamma distribution (level set at 1.0) and with a Poisson  
251 correction.

252



253 **Recombinant *Fasciola hepatica* glutathione transferase Mu class (rFhGST-**  
254 **Mu5) production**

255 FhGST-Mu5 was amplified via PCR using the following primer pair: rFhGST-Mu5  
256 forward primer, 5' **CATATGGCTCCAGTCTTA** 3'; rFhGSTMu5 reverse primer, 5'  
257 **GCGGCCGC**TTAACTGGGTGGTGCA 3' and a second reverse primer containing  
258 the stop codon 5' **GCGGCCGC**ACTTTAACTGGGTGGTGCA 3'. Restriction enzyme  
259 sites (in bold type and underlined) for NdeI (forward primer) and NotI (reverse  
260 primer) were included so that the entire ORF could be directly cloned into the  
261 pET23a (Novagen) vector. Recombinant proteins were produced in *Escherichia coli*  
262 BL21 (DE3) cells (Bioline) as described previously (LaCourse, Perally et al. 2012;  
263 Morphew, Eccleston et al. 2012).

264

265 *E.coli* preparations containing rFhGST-Mu5 were suspended in lysis buffer  
266 (containing 5 mM MgCl<sub>2</sub>, 400 mM NaCl and 20 mM sodium phosphate pH7.4) and  
267 were lysed through a freeze/thaw method, freezing in liquid nitrogen followed by  
268 thawing at 42°C three times. This was followed by 3 cycles of ultrasonication; the  
269 samples were sonicated for 30 seconds with 30 second intervals in ice. The samples  
270 were centrifuged at 13,200 x *g* for 20 minutes at 4°C. and purified by GSH-affinity  
271 chromatography as described previously.

272

273 **Results**

274 **Limited induction of soluble *F. hepatica* GST by TCBZ-SO**

275 Prior to affinity chromatography GST enzymatic specific activity was assessed to  
276 examine if overall cytosolic GST activity was induced by TCBZ-SO exposure (Table  
277 1). In general, there was a trend to increased GST specific activity following  
278 exposure to TCBZ-SO for treatment groups compared to controls (Supplementary  
279 Figure 1). However, following ANOVA no significant difference was noted between  
280 any of the treatment groups or the controls ( $2_{df}$ ,  $F = 1.25$ ,  $P = 0.320$ ).

281

282

283 **GST proteomic profiling of individual fluke**

284 Two affinity matrices were then used to isolate GST isoforms from individual adult *F.*  
285 *hepatica*. 18 individuals were homogenised independently and all 18 independently  
286 processed through GSH or S-Hexyl GSH agarose columns to separate *F. hepatica*

287 GST proteins from other soluble proteins. Following purification, it was possible to  
288 compare the GST-ome from each individual *F. hepatica* exposed to TCBZ-SO, either  
289 a Sub-lethal concentration (15 µg/ml) or a Lethal concentration (50 µg/ml), versus  
290 those not exposed using 2-DE proteomics.

291

292 Proteomic arrays of the GSTs purified from S-hexyl GSH-agarose consistently  
293 yielded 13 protein spots (Figure 1A), whereas those purified from GSH-agarose  
294 column yielded 11 prominent protein spots (Figure 1B). All protein spots from both  
295 purification systems were confirmed as containing *Fasciola* GSTs using tandem  
296 mass spectrometry (Table 2; Full proteomic analysis Supplementary Table 1).  
297 Comparison of 2-DE protein arrays was then performed to establish if there was a  
298 change in abundance of the identified GSTs relating to the different treatment of  
299 TCBZ-SO (Figure 1C-F).

300

301 When comparing the S-Hexyl GSH Control array with both the S-Hexyl GSH TCBZ-  
302 SO exposed arrays it was noted that spot 14 (Figure 1A,C and E) was present on all  
303 Control arrays, thus present on the average Control array. However, the presence of  
304 this protein spot varied on the TCBZ-SO treatment arrays (Sub-lethal & Lethal). This  
305 particular protein spot was only present on 2 Sub-lethal arrays and 1 Lethal array.  
306 MSMS analysis identified this spot as Mu class GST29 (THD21358).

307

308 The comparison of the arrays produced via GSH agarose affinity columns identified  
309 two protein spots of interest when the average Control and average Sub-lethal  
310 arrays were examined with both spots increased in abundance in Sub-lethal  
311 samples; Spot 5, Mu class GST 26, ( $1_{df}$ ,  $F = 3.89$ ,  $P = 0.089$ ) and Spot 7, Mu class  
312 GST 29, ( $1_{df}$ ,  $F = 4.83$ ,  $P = 0.064$ ) both approaching statistical significance (Figure  
313 1B and D; Supplementary Figure 2). No additional changes in protein abundance  
314 were observed for GSH purifications.

315

### 316 **GST expression in the cytosol of individual fluke and affinity binding**

317 Given the potential of Mu class GSTs responding to TCBZ-SO exposure, Western  
318 blotting was used to estimate the number of Mu class GSTs present in liver fluke  
319 cytosol prior to affinity chromatography, given previous indications that some GST

320 isoforms may fail to bind to affinity matrices (Brophy, Crowley et al. 1990). Assays  
321 were undertaken on five individual adult fluke using anti-*S. mansoni* Mu class  
322 polyclonal antibodies, previously shown to recognise *F. hepatica* Mu class GSTs  
323 (Chemale, Morphey et al. 2006). The anti-flatworm GST Mu class antibody  
324 recognised 8 GST subunits within the cytosolic profile (Figure 2A). Post purification  
325 the blot patterns display the same distinctive GST protein profiles following both  
326 GSH and S-Hexyl GSH affinity 2-DE gels (Figure 2B-C). A distinctive and  
327 reproducible 2-DE GST profile provides evidence that 8 GST subunits are  
328 recognized by the Mu antibody post purification.

329

### 330 **Bioinformatic characterisation of GSTs identified in *F. hepatica***

331 Following analysis of available transcript and genome sequences the known 4 Mu  
332 class GSTs were identified alongside a fifth Mu class GST designated FhGST-Mu5.  
333 Following cloning and sequencing of FhGST-Mu5, multiple alignment of all Mu class  
334 GSTs of *F. hepatica* revealed the extent of identity and similarity across this class of  
335 GSTs (Figure 3A). Amino acid sequence similarity when comparing the newly  
336 identified FhGST-Mu5 (Genbank MT613329) with the previously known *F. hepatica*  
337 Mu class GSTs identified the closest sequence similarity was with FhGST-7 at  
338 approximately 54%. It is also worth noting that Genbank entry THD26413 matches  
339 to FhGST-Mu5 with 91.9% sequence identity but is an incomplete sequence lacking  
340 the N-terminus. When transcript expression was analysed for FhGST-Mu5 based on  
341 Cwiklinski *et al.* (2018), the levels of transcript within the adult is significantly lower  
342 than in alternative life cycle stages such as metacercariae and newly excysted  
343 juveniles from 1 to 24 h (Figure 3B).

344 Further transcript and genome investigation allowed the examination of the complete  
345 GSTome of *F. hepatica*. In addition to FhGST-Mu5, *in silico* investigation revealed  
346 the identification of a second Sigma class and a second Omega class GST.  
347 Bioinformatic characterization of the new FhGST-S2 and FhGST-O2 was  
348 undertaken to identify the structural features and characteristics of these  
349 genes/proteins. Only a single homologue for each was identified in the original *F.*  
350 *hepatica* genome. For FhGST-S2, gene BN1106\_s1104B000225 (Scaffold 1104)  
351 was identified yet this is now fragmented and incomplete in the most recent version

352 of the genome (PRJEB25283) despite transcript support (Supplemental Table 2).  
353 For FhGST-O2, gene BN1106\_s50B000678 (Scaffold 50) was revealed and is now  
354 designated as maker-scaffold10x\_938\_pilon-snap-gene-0.52/D915\_03058. Each  
355 gene encoded for a predicted single protein isoform.

356 Both the newly predicted FhGST-S2 and FhGST-O2 were cloned (Supplemental  
357 Figure 3A) and sequenced. Confirmation of the correct class assignment was  
358 performed with multiple alignment (Supplemental Figure 3B and 3C) and  
359 comparison of gene intron exon structure (Supplemental Figure 4). Of note was a  
360 significant N-terminal extension of 20 amino acids in FhGST-S2 when compared to  
361 FhGST-S1. FhGST-O2 in comparison to FhGST-O1 revealed the addition of 1  
362 amino acid to each of exons 1 and 5. Further confirmation of class assignment was  
363 support with both FhGST-S2 and FhGST-O2 subjected to a PFam domain analysis  
364 revealing key predicted GST features; FhGST-S2 with a predicted C-terminal  
365 domain (PFam GST\_C\_3) and FhGST-O2 with a predicted N- and C-terminal  
366 domain (PFam GST\_N\_3 and GST\_C\_2).

367 Following a full phylogenetic analysis of the completed *F. hepatica* GST-ome, all of  
368 the newly identified FhGST-Mu5, FhGST-S2 and FhGST-O2 were assigned to their  
369 respective clades (Figure 4). Of note is the close association of FhGST-Mu5 to the  
370 Schistosome Mu class GSTs rather than to the previously established four *Fasciola*  
371 Mu class isoforms.

372

### 373 **Expression, purification and characterisation of rFhGST-Mu5**

374 Full sequence length recombinant *F. hepatica* Mu class GST (rFhGST-Mu5) was  
375 expressed and purified from transformed *E.coli* cytosol following expression in BL21  
376 (DE3) cells. Purity was assessed on SDS-PAGE gels (Figure 3C). Interestingly,  
377 rFhGST-Mu5 was not able to be produced as a pure protein with significant levels of  
378 contaminating *E. coli* proteins remaining in the sample following GSH affinity  
379 purification. However, rFhGST-Mu5 was produced as an active protein for further  
380 studies displaying enzymatic activity towards the model GST substrate 1-chloro-2,4-  
381 dinitrobenzene (CDNB). The specific activity for the rFhGST-Mu5 preparation was  
382 confirmed at  $243.27 \pm 92.45$  nmol/min/mg.

383

384 **Discussion**

385 The 2-DE mapping of GSTs has been shown to be a useful tool to delineate the  
386 function of individual members of this soluble protein superfamily (Chemale,  
387 Morphew et al. 2006; Morphew, Eccleston et al. 2012), particularly as these proteins  
388 play a role in Phase II detoxification (Cvilink, Lamka et al. 2009). To date, research  
389 has only been completed on pooled cytosol samples from wild-type fluke and  
390 defined isolates and there has not been a robust sub-proteomic study that compared  
391 the expression of GST isotypes in individual fluke populations under TCBZ-SO  
392 challenge in culture. This study has adapted the pooled approach and, for the first  
393 time, performed analytical scale 2-DE mapping of GSTs from individual *F. hepatica*  
394 adult parasites. Thus, GSTs were purified from the cytosol of single adult flukes  
395 using either S-Hexyl Glutathione or Glutathione agarose columns, resolved using  
396 analytical 2-DE and identified individual GSTs by MSMS with the support of liver  
397 fluke transcriptomic and genomic databases. In doing so, we can identify individual  
398 fluke responses within the GST superfamily following exposure to  
399 chemotherapeutics. Furthermore, this finding has major implications for future  
400 population and resistance monitoring studies specifically on, but not limited to, liver  
401 fluke GSTs.

402

403 In the current study, both S-Hexyl GSH agarose and GSH agarose columns were  
404 used for GST purification at the individual fluke level. Previous studies (Chemale,  
405 Morphew et al. 2006; Morphew, Eccleston et al. 2012) have demonstrated that S-  
406 Hexyl GSH agarose columns have the ability to purify a greater range of GSTs in  
407 both *F. hepatica* and *F. gigantica* population mixes respectively thus was a useful  
408 inclusion in the current work at the individual fluke level. Using biochemical  
409 techniques and analytical sub-proteomics identified both Sigma and Mu class GSTs  
410 purified from individual adult *F. hepatica*. It was confirmed that both S-Hexyl GSH  
411 and GSH agarose columns have the ability to purify both Mu and Sigma class GSTs,  
412 but with GSH columns purifying the Sigma class to a much lesser extent expressing  
413 a preference to purify Mu class GSTs as observed for pooled samples (Chemale,  
414 Morphew et al. 2006).

415

416 The overall GST-ome profile, via GST activity and 2-DE arrays, demonstrated a  
417 general trend of response to TCBZ-SO exposure. Following exposure GST specific

418 activity increased with increasing TCBZ-SO concentration. In addition, the only  
419 changes noted in both S-Hexyl GSH and GSH agarose purifications were recorded  
420 abundance changes associated with Mu class GSTs, specifically FhGST-Mu29 and  
421 FhGST-Mu26. Therefore, from activity data and proteomic profiling, it is likely that,  
422 of the two GST classes identified, Mu class GSTs are likely highly important for  
423 xenobiotic detoxification with Sigma class GSTs acting as secondary xenobiotic  
424 sequesters with a primary role as a house-keeping enzyme and as, more  
425 importantly, an immunomodulatory (LaCourse, Perally et al. 2012). This finding of  
426 Mu class GST-TCBZ-SO detoxification supports the work of Chemale *et al.* (2010)  
427 examining the TCBZ-SO response of TCBZ-resistant and TCBZ-susceptible  
428 isolates. In this case, both FhGST-Mu29 and FhGST-Mu26 responded to TCBZ-SO  
429 exposure, in agreement with the current study. We identified changes in response to  
430 TCBZ-SO exposure linked to dimer and monomer formation of FhGST-Mu29 and  
431 differential purification of both using the two purification methods. S-hexyl GSH  
432 purification was more efficient at purifying FhGST-Mu29 dimers compared to GSH  
433 agarose purification. On exposure to TCBZ-SO a reduction in FhGST-Mu29 dimers  
434 was observed with a corresponding increase in FhGST-Mu29 monomers purified  
435 through GSH agarose. The novel dimer-monomer GST conformational switch might  
436 reflect a new liver fluke mechanism in response to TCBZ-SO challenge. GSTs  
437 normally function as dimers but active monomeric GSTs have been previously  
438 identified in *F. hepatica* (Brophy et al., 1990).

439

440 In *F. hepatica* there are four recognised isoforms of Mu class GSTs i.e. FhGST-  
441 Mu26, 27, 28 & 29 (alternatively called FhGST-Mu51, 47, 7 & 1) with a fifth identified  
442 only through bioinformatics previously (Morphew, Eccleston et al. 2012), and now  
443 cloned and expressed in the current work. Alongside the identification of FhGST-S1,  
444 four of the five Mu class GST isoforms were identified in the samples examined in  
445 the current study under TCBZ-SO stress. In previous proteomic studies the same  
446 four classes have also been identified. However, the functional significance of  
447 multiple Mu GSTs is as yet unknown. Multiple Mu class isoforms might relate to their  
448 role in the protection of the parasite from various classes of xenobiotics derived from  
449 the host bile environment (Brophy, Mackintosh et al. 2012). Specifically, the current  
450 work supports a role for FhGST-Mu29 in TCBZ-SO response via conformational  
451 changes as identified by evidence of altered in dimer/monomer ratios. Of interest,

452 based on transcriptome evidence of Cwiklinski *et al.* (2018) FhGST-Mu29 is  
453 naturally the highest expressed Mu class GST in adult fluke. In addition, FhGST-  
454 Mu26 ranks third in all Mu class GST expression (FhGST-Mu29 > Mu27 > Mu26 >  
455 Mu5 > Mu28). Therefore, it is likely that these primary expressed GSTs are  
456 important in binding xenobiotics with structures such as such as TCBZ-SO.

457

458 In many cases peptides belonging to different GSTs were identified in a single  
459 protein spot providing the identification of multiple GST isoforms. As reported by  
460 Chemale *et al.* (2006), this may result from spot overlapping in the 2-DE gels, as  
461 proteins may have a similar *pI*, potential modifications and co-migration. Of note is  
462 the failure to identify the fifth Mu class GST, FhGST-Mu5, despite overlapping GST  
463 isoforms identified in multiple spots. Given a sequence similarity of 54% for FhGST-  
464 Mu5 compared to FhGST-7 the failure to identify FhGST-Mu5 is unlikely to be from  
465 miss assigning sequenced peptides to alternative Mu class GSTs and likely  
466 represents low expression as evidenced from transcriptomics (Cwiklinski, Jewhurst  
467 *et al.* 2018) or, given the poor affinity purification of FhGST-Mu5, non-binding to  
468 affinity columns.

469

470 In an attempt to assess if FhGST-Mu5 was not identified in affinity purified samples  
471 as a result of non-binding, *F. hepatica* cytosolic material was probed with anti-*S.*  
472 *mansoni* Mu polyclonal antibodies and compared with the profiles obtained post  
473 affinity purification. Given that the same repertoire of protein spots following Western  
474 blotting was visualised on both cytosolic and affinity purified fractions, in addition to  
475 FhGST-Mu5 recognition by anti-*S. mansoni* Mu (data not shown), it seems unlikely  
476 that FhGST-Mu5 was missed in the affinity proteomics study. In addition, it seems  
477 unlikely that FhGST-Mu5 was missed due to low expression in adults given the  
478 identification of FhGST-Mu28 in the current work and in previous studies (Chemale,  
479 Morpew *et al.* 2006). Thus, the potential exists that FhGST-Mu5 is a low affinity  
480 isoform. In support, Brophy *et al.* (1990) proposed that an endogenous ligand  
481 interacts with GSTs preventing GSTs binding to the affinity matrix generating a 'low  
482 affinity' fraction. Therefore, general inhibitory binding factors are likely present in the  
483 liver fluke cytosol and may be important in flatworm GST function.

484

485 Following the successful induction and expression of FhGST-Mu5 it is clear that 'low  
486 affinity' GSTs are produced within the GST-ome of *F. hepatica* yet not all GSTs fail  
487 to bind from potential inhibitory factors. GSH affinity purification of rFhGST-Mu5  
488 resulted in low impure yields of recombinant protein and suggests that FhGST-Mu5  
489 is a 'low affinity' isoform. Previous studies have all successfully used glutathione  
490 affinity chromatography for successful purification of native and recombinant GSTs  
491 (Chemale, Morphew et al. 2006; LaCourse, Perally et al. 2012; Morphew, Eccleston  
492 et al. 2012) yet failed to purify FhGST-Mu5. Thus, to determine if rFhGST-Mu5 is an  
493 isoform with 'low affinity' for glutathione the specific activity was determined with the  
494 model substrate CDNB (Habig, Pabst et al. 1974). The specific activity of rFhGST-  
495 Mu5 was significantly lower than that recorded for the previously known 4 Mu Class  
496 GSTs from *F. hepatica* (Salvatore, Wijffels et al. 1995; Kalita, Shukla et al. 2017).  
497 This lower affinity may be correlated with the lower sequence homology and the  
498 more distant grouping of FhGST-Mu5 in phylogenetic modelling aligning closer to  
499 schistosome Mu class GSTs rather than the previous four *F. hepatica* Mu class.  
500 Brophy *et al.* (1990) demonstrated that following chromatofocusing 95% of 'low  
501 affinity' GSTs were relieved of their inhibition and thus, based on current evidence, it  
502 is likely that FhGST-Mu5 could indeed be classed as a 'low affinity' Mu class GST as  
503 part of the remaining 5% of activity. Low GSH affinity most likely accounts for the  
504 previous lack of detection during affinity studies with the initial identification achieved  
505 through transcriptomic analysis (Morphew, Eccleston et al. 2012). Given that  
506 FhGST-Mu5 clustered with schistosome Mu class GSTs during phylogenetics it is  
507 possible that FhGST-Mu5 and schistosome Mu class GSTs perform similar roles  
508 within these fluke species.

509

510 The current study represents the first 2-DE profiling of TCBZ-SO exposed *F.*  
511 *hepatica* GSTs. However, TCBZ-SO stress in *F. gigantica*, and the resulting GST  
512 activity, has been previously investigated. Shehab *et al.* (2009) examined GST  
513 activities from crude homogenates of adult and juvenile *F. gigantica* exposed to  
514 TCBZ-SO concentrations. This research indicated that a significant increase in the  
515 level of GST was present, in both adult and juvenile flukes, after exposure to TCBZ-  
516 SO (Shehab, Ebeid et al. 2009). Such a significant increase in response to TCBZ-  
517 SO prior to affinity purification was not noted in the current research and may reflect  
518 important differences between *F. hepatica* and *F. gigantica* GST expression.



519 Nevertheless, the work of Shehab and colleagues further supports the role of Mu  
520 class GST in TCBZ-SO detoxification.

521

522 The release of the genome assemblies of *F. hepatica* (Cwiklinski, Dalton et al. 2015;  
523 McNulty, Tort et al. 2017) has allowed for further in-depth and complete investigation  
524 of the GST-ome complement of this parasitic flatworm. Two new soluble superfamily  
525 GSTs were identified; a second Sigma ( $\sigma$ ) class and a second Omega ( $\omega$ ) class, on  
526 original genes BN1106\_s1104B000225 and BN1106\_s50B000678 (scaffolds 1104  
527 and 50, respectively). Both GSTs contained Pfam IDs for the respective GSTs and  
528 both sequences were successfully amplified through PCR and sequence verified.  
529 The predicted molecular weight of the sub-units of the newly identified Sigma and  
530 Omega GSTs were shown to be 26 and 27 kDa respectively, and this is in general  
531 agreement with known soluble GSTs that have a subunit mass of between 23 and  
532 28 kDa with an average length of 220 amino acids (Torres-Rivera and Landa 2008).  
533 Gene structure analysing introns and exons for both the newly identified Sigma and  
534 Omega genes in comparison with the previously identified *F. hepatica* Sigma and  
535 Omega supported the confirmation of GST class assignment.

536

537 Previous research has demonstrated that model organisms (humans and mice) both  
538 encode for 2 Omega class GST genes which are widely expressed (Board 2011)  
539 reflecting expression within *F. hepatica*, albeit human and mice omega GSTs  
540 comprise of six exons (Board 2011) rather than 5 in *F. hepatica* omega class GSTs.  
541 Interestingly, omega class GSTs have been linked with drug resistance in human  
542 cancers (Townsend and Tew 2003) and Alzheimer's disease (Allen, Zou et al. 2012)  
543 and thus may have some role in anthelmintic resistance or detoxification not yet  
544 discovered.

545

546 Sigma class GSTs in *F. hepatica* were also initially identified by Chemale *et al.*  
547 (2006). A recombinant form of *F. hepatica* Sigma class GST, FhGST-S1, has since  
548 been produced and demonstrated to have multi-functional roles, including general  
549 endogenous detoxification, and is strongly linked with prostaglandin synthesis and  
550 the modulation of dendritic cell activity (LaCourse, Perally et al. 2012). Across  
551 trematode species the exon-intron structure of Sigma class GSTs is conserved.  
552 Recently, reports of 5 newly identified Sigma class GSTs from *Clonorchis sinensis*

553 consist of 4 exons akin to the two *F. hepatica* genes (Bae, Kim et al. 2016). It was  
554 also noted that the final exon, exon 4, of Sigma GST genes in the gene predictions  
555 of all the trematode species investigated by Bae *et al.* (2016) consisted of 225 bp;  
556 this conservation of gene structure likely reflects conserved biological function. As  
557 yet, proteomic investigations have not identified FhGST-S2 from adult flukes despite  
558 their presence in adult transcriptomes. It is therefore likely that FhGST-S2 remains  
559 part of the unbound fraction of the GST-ome; a likely 'low affinity' sigma class GST.

560

561 With a key role for GSTs in the detoxification of TCBZ demonstrated through  
562 proteomic profiling it is now crucial to understand any involvement of GSTs in TCBZ  
563 resistance. This is of particular importance given that Scarcella *et al.* (2012)  
564 identified that fluke resistant to TCBZ expressed significantly higher levels of GST  
565 activity compared to susceptible flukes. The authors suggest that under TCBZ-SO  
566 exposure there is an increased requirement for Phase I detoxification of TCBZ-SO,  
567 to the less effective TCBZ-SO<sub>2</sub>, and thus also require increased Phase II  
568 detoxification, principally from GSTs, to catalyse TCBZ intermediates. Given the  
569 recent bioinformatics identification of a potential Cytochrome P450 (Cwiklinski,  
570 Dalton et al. 2015), TCBZ-SO exposure is likely to stimulate this Phase I pathway  
571 leading to an increased requirement for phase II GSTs. Therefore, profiling the  
572 specific GST isoforms will give more insight into resistance mechanisms.

573

## 574 **Conclusions**

575 Glutathione transferases (GSTs) are a multi-gene family of ubiquitous multifunctional  
576 proteins that are predicted to have major roles in detoxifying both endogenous and  
577 exogenous toxins as part of the Phase II system. We have expanded the knowledge  
578 on this important protein family in the parasitic flatworm *F. hepatica*. In doing so, we  
579 have revealed novel GST members including 'low affinity' Mu and Sigma class  
580 enzymes. In addition, it is clear that GSTs respond to TCBZ-SO exposure and the  
581 role of GSTs in TCBZ resistance awaits further investigation. Finally, the ability to  
582 incorporate individual fluke for proteomic and sub-proteomic studies has implications  
583 for potential early TCBZ resistance monitoring in liver fluke populations.

584

## 585 **Acknowledgements**

586 The authors are grateful to Randall Parker Foods (Wales) for providing *F. hepatica*  
587 infected sheep livers. This work was supported by the Biotechnology and Biological  
588 Sciences Research Council through an IBERS PhD Scholarship award and through  
589 Innovate UK (Grant Number: 102108).

590

## 591 **References**

592 Allen, M., F. G. Zou, et al. (2012). "Glutathione S-transferase omega genes in  
593 Alzheimer and Parkinson disease risk, age-at-diagnosis and brain gene  
594 expression: an association study with mechanistic implications." Molecular  
595 Neurodegeneration **7**.

596 Alvarez, L., G. Moreno, et al. (2009). "Comparative assessment of albendazole and  
597 triclabendazole ovicidal activity on *Fasciola hepatica* eggs." Veterinary  
598 Parasitology **164**(2-4): 211-216.

599 Alvarez, L. I., H. D. Solana, et al. (2005). "Altered drug influx/efflux and enhanced  
600 metabolic activity in triclabendazole-resistant liver flukes." Parasitology **131**:  
601 501-510.

602 Andrews, S. J. (1999). The life cycle of *Fasciola hepatica*. Fasciolosis. J. P. Dalton.  
603 Oxford, C. A. B. International: 1-30.

604 Bae, Y. A., J. G. Kim, et al. (2016). "Phylogenetic characterization of *Clonorchis*  
605 *sinensis* proteins homologous to the sigma-class glutathione transferase and  
606 their differential expression profiles." Molecular and Biochemical Parasitology  
607 **206**(1-2): 46-55.

608 Board, P. G. (2011). "The omega-class glutathione transferases: structure, function,  
609 and genetics." Drug Metabolism Reviews **43**(2): 226-235.

610 Boray, J. C. (1997). Chemotherapy of infections with fasciolidae. Immunology,  
611 pathobiology and control of Fasciolosis. J. C. Boray. New Jersey, MSD  
612 AGVET Rahway: 83-97.

613 Bradford, M. M. (1976). "Rapid and sensitive method for quantitation of microgram  
614 quantities of protein utilizing principle of protein dye binding." Analytical  
615 Biochemistry **72**(1-2): 248-254.

616 Brennan, G. P., I. Fairweather, et al. (2007). "Understanding triclabendazole  
617 resistance." Experimental and Molecular Pathology **82**(2): 104-109.

- 618 Brophy, P. M., P. Crowley, et al. (1990). "Detoxification reactions of *Fasciola*  
619 *hepatica* cytosolic glutathione transferases." Molecular and Biochemical  
620 Parasitology **39**(2): 155-162.
- 621 Brophy, P. M., N. Mackintosh, et al. (2012). "Anthelmintic Metabolism in Parasitic  
622 Helminths: Proteomic Insights." Parasitology **139**(9): 1205-1217.
- 623 Chemale, G., R. Morphew, et al. (2006). "Proteomic analysis of glutathione  
624 transferases from the liver fluke parasite, *Fasciola hepatica*." Proteomics  
625 **6**(23): 6263-6273.
- 626 Chemale, G., S. Perally, et al. (2010). "Comparative Proteomic Analysis of  
627 Triclabendazole Response in the Liver Fluke *Fasciola hepatica*." Journal of  
628 Proteome Research **9**(10): 4940-4951.
- 629 Cvilink, V., J. Lamka, et al. (2009). "Xenobiotic metabolizing enzymes and  
630 metabolism of anthelmintics in helminths." Drug Metabolism Reviews **41**(1):  
631 8-26.
- 632 Cwiklinski, K., J. P. Dalton, et al. (2015). "The *Fasciola hepatica* genome: gene  
633 duplication and polymorphism reveals adaptation to the host environment and  
634 the capacity for rapid evolution." Genome Biology **16**.
- 635 Cwiklinski, K., H. Jewhurst, et al. (2018). "Infection by the Helminth Parasite *Fasciola*  
636 *hepatica* Requires Rapid Regulation of Metabolic, Virulence, and Invasive  
637 Factors to Adjust to Its Mammalian Host." Molecular & Cellular Proteomics  
638 **17**(4): 792-809.
- 639 El-Gebali, S., J. Mistry, et al. (2019). "The Pfam protein families database in 2019."  
640 Nucleic Acids Research **47**(D1): D427-D432.
- 641 Falkner, J. A., J. W. Falkner, et al. (2007). "ProteomeCommons.org IO Framework:  
642 reading and writing multiple proteomics data formats." Bioinformatics **23**(2):  
643 262-263.
- 644 Fernandez, V., S. Estein, et al. (2015). "A single amino acid substitution in isozyme  
645 GST mu in Triclabendazole resistant *Fasciola hepatica* (Sligo strain) can  
646 substantially influence the manifestation of anthelmintic resistance."  
647 Experimental Parasitology **159**: 274-279.
- 648 Habig, W. H., M. J. Pabst, et al. (1974). "Glutathione S-transferases: the first  
649 enzymatic step in mercapturic acid formation." Journal of Biological Chemistry  
650 **249**(22): 7130-7139.

- 651 Hall, T. A. (1999). "BioEdit: a user-friendly biological sequence alignment editor and  
652 analysis program for Windows 95/98/NT." Nucleic Acids Symposium Series  
653 **41**: 95-98.
- 654 Hayes, J. D. and D. J. Pulford (1995). "The glutathione S-Transferase supergene  
655 family: Regulation of GST and the contribution of the isoenzymes to cancer  
656 chemoprotection and drug resistance." Critical Reviews in Biochemistry and  
657 Molecular Biology **30**(6): 445-600.
- 658 Kalita, J., R. Shukla, et al. (2017). "Comprehensive analysis of the catalytic and  
659 structural properties of a mu-class glutathione s-transferase from *Fasciola*  
660 *gigantica*." Scientific Reports **7**.
- 661 LaCourse, J. E., S. Perally, et al. (2012). "The Sigma Class Glutathione Transferase  
662 of the Liver Fluke *Fasciola hepatica*." Plos Neglected Tropical Diseases **5**(1):  
663 e937 . doi:910.1371/journal.pntd.0000937.
- 664 McNulty, S. N., J. F. Tort, et al. (2017). "Genomes of *Fasciola hepatica* from the  
665 Americas Reveal Colonization with *Neorickettsia* Endobacteria Related to the  
666 Agents of Potomac Horse and Human Sennetsu Fevers." Plos Genetics  
667 **13**(1).
- 668 Mophew, R. M., N. Eccleston, et al. (2012). "Proteomics and *In Silico* Approaches to  
669 Extend Understanding of the Glutathione Transferase Superfamily of the  
670 Tropical Liver Fluke *Fasciola gigantica*." Journal of Proteome Research  
671 **11**(12): 5876-5889.
- 672 Mophew, R. M., N. MacKintosh, et al. (2014). "*In vitro* biomarker discovery in the  
673 parasitic flatworm *Fasciola hepatica* for monitoring chemotherapeutic  
674 treatment." EuPA Open Proteomics **3**: 85-99.
- 675 Mophew, R. M., H. A. Wright, et al. (2011). "Towards Delineating Functions within  
676 the *Fasciola* Secreted Cathepsin L Protease Family by Integrating *In Vivo*  
677 Based Sub-Proteomics and Phylogenetics." Plos Neglected Tropical  
678 Diseases **5**(1): e937. doi:910.1371/journal.pntd.0000937.
- 679 Moxon, J. V., E. J. LaCourse, et al. (2010). "Proteomic analysis of embryonic  
680 *Fasciola hepatica*: Characterization and antigenic potential of a  
681 developmentally regulated heat shock protein." Veterinary Parasitology  
682 **169**(1-2): 62-75.

- 683 Salvatore, L., G. Wijffels, et al. (1995). "Biochemical analysis of recombinant  
684 glutathione S-transferase of *Fasciola hepatica*." Molecular and Biochemical  
685 Parasitology **69**(2): 281-288.
- 686 Scarcella, S., P. Lamenza, et al. (2012). "Expression differential of microsomal and  
687 cytosolic glutathione-S-transferases in *Fasciola hepatica* resistant at  
688 triclabendazole." Molecular and Biochemical Parasitology **181**(1): 37-39.
- 689 Shehab, A. Y., S. M. Ebeid, et al. (2009). "Detoxifying and Anti-Oxidant Enzymes of  
690 *Fasciola gigantica* Worms Under Triclabendazole Sulphoxide (TCBZ-SX): An  
691 *In Vitro* Study." Journal of the Egyptian Society of Parasitology **39**(1): 73-83.
- 692 Tamura, K., J. Dudley, et al. (2007). "MEGA4: Molecular Evolutionary Genetics  
693 Analysis (MEGA) software version 4.0." Molecular Biology and Evolution  
694 **Available online 10.1093/molbev/msm092.**
- 695 Thomas, I., G. C. Coles, et al. (2000). "Triclabendazole-resistant *Fasciola hepatica*  
696 in southwest Wales." Veterinary Record **146**(7): 200-200.
- 697 Torres-Rivera, A. and A. Landa (2008). "Glutathione transferases from parasites: A  
698 biochemical view." Acta Tropica **105**(2): 99-112.
- 699 Townsend, D. M. and K. D. Tew (2003). "The role of glutathione-S-transferase in  
700 anti-cancer drug resistance." Oncogene **22**(47): 7369-7375.
- 701 Young, N. D., R. S. Hall, et al. (2010). "Elucidating the transcriptome of *Fasciola*  
702 *hepatica* - A key to fundamental and biotechnological discoveries for a  
703 neglected parasite." Biotechnology Advances **28**(2): 222-231.
- 704 Young, N. D., A. R. Jex, et al. (2011). "A Portrait of the Transcriptome of the  
705 Neglected Trematode, *Fasciola gigantica*-Biological and Biotechnological  
706 Implications." Plos Neglected Tropical Diseases **5**(2).

707

708

709

710 **Figure 1:** Representative 2-DE arrays of GSTs purified from *F. hepatica* using S-  
711 hexyl GSH and GSH agarose columns following TCBZ-SO exposure. A) S-hexyl  
712 GSH agarose purified GSTs from Control samples (TCBZ-SO 0 µg/ml). B) GSH  
713 agarose purified GSTs from Control samples (TCBZ-SO 0 µg/ml). C) S-hexyl GSH  
714 agarose purified GSTs from Sub-lethal samples (TCBZ-SO 15 µg/ml). D) GSH  
715 agarose purified GSTs from Sub-lethal samples (TCBZ-SO 15 µg/ml). E) S-hexyl  
716 GSH agarose purified GSTs from Lethal samples (TCBZ-SO 50 µg/ml). F) GSH  
717 agarose purified GSTs from Lethal samples (TCBZ-SO 50 µg/ml). All arrays were  
718 run on 7 cm IPG strips pH 3-10, 12.5% SDS PAGE and Coomassie blue stained.  
719 Spot numbers relate to GST putative identifications seen in Table 2.

720

721 **Figure 2:** Assessment of Mu class GST binding affinity through Western blotting of  
722 affinity purified GSTs comparison to cytosolic fractions. A) Visualisation of TCA  
723 precipitated cytosolic proteins of *F. hepatica* adult worms using two-dimensional gel  
724 electrophoresis (2-DE) and Western blot analysis probing for Mu class GSTs. In  
725 total, 100 µg of cytosolic protein was resolved on non-linear IPG strips and 12.5%  
726 polyacrylamide gels. B) and C) Visualisation of GSH agarose purified GST subunits  
727 of *F. hepatica* adult worms using two-dimensional gel electrophoresis (2-DE) and  
728 Western blot analysis analysis probing for Mu class GSTs. In total, 5 µg of GSH or  
729 S-Hexyl GSH purified GSTs were resolved on non-linear IPG strips and 12.5%  
730 polyacrylamide gels. A), B) and C) Western blots probed with anti-*S. mansoni* Mu  
731 antibody (1:5,000 dilution) and developed using alkaline phosphatase linked  
732 secondary antibody (anti-Goat IgG).

733

734 **Figure 3.** Bioinformatics, Expression and purification of recombinant rFhGST-Mu5.  
735 A) Multiple alignment of the 4 established *F. hepatica* Mu class GSTs and the newly  
736 identified FhGST-Mu5 revealed through transcriptome/genome analysis. No other  
737 Mu class GSTs were identified within the genome of *F. hepatica*. The consensus  
738 sequence SNAIL/TRAIL and their synonymous sequences in parasites are in the  
739 solid-line grey box. The residues forming the µ-loop are in dotted-line grey box.  
740 Arrowed are predicted GSH binding sites. Amino acid sequence identity of FhGST-  
741 Mu5 with the four previously known Mu class GSTs is provided at the end of the  
742 alignment. Accession numbers for each Mu class GST used: FhGST-Mu29/1  
743 (P56598), FhGST-Mu28/7 (P31671), FhGST-Mu27/47 (P31670) and FhGST-

744 Mu26/51 (P30112). B) Transcript expression levels for FhGST-Mu5 were analysed  
745 from Cwiklinski *et al.* (2018). C) SDS-PAGE gel of the expression and purification of  
746 rFhGST-Mu. L: *E. coli* total cytosolic protein lysate, 10 µg. W1 and W2: Column  
747 washes removing non-binding proteins, 10 µl. FT: Flow through proteins collected  
748 after passing through a GSH-agarose column, 10 µg. E: Eluted GSH-affinity purified  
749 recombinant rFhGST-Mu5 protein, 2 µg. Run on 12.5% SDS-PAGE and  
750 Coomassie blue stained. Arrowed is the band representing rFhGST-Mu5.

751

752 **Figure 4:** Phylogenetic analysis of the soluble cytosolic GST superfamily.  
753 Neighbour-joining phylogenetic tree constructed using amino acid sequences  
754 through MEGA v 7.0 with 1000 bootstrapped support and a Poisson correction. All  
755 reported accession numbers are from Genbank. Where sequences were identified *in*  
756 *silico*, only contig numbers are reported. Those from *F. gigantica* were taken from  
757 the study of Young *et al.* (2011) and transcripts produced by Aberystwyth University.  
758 Those from *F. hepatica* were taken from the study of Young *et al.* (2010) and  
759 transcripts produced by the University of Liverpool (EBI-ENA archive ERP000012:  
760 An initial characterization of the *F. hepatica* transcriptome using 454-FLX  
761 sequencing).

762

763



764 **Table 1:** GST specific activity assays of *F. hepatica* GST samples exposed to  
765 TCBZ-SO at Control (0 µg/ml), Sub-lethal (15 µg/ml) or Lethal (50 µg/ml) dose. Total  
766 activity (nmol/min), total protein (mg) and specific activity (nmol/min/mg) are  
767 included.

| Treatment  | Total activity (nmol/min). | Total protein (mg). | Specific activity (nmol/min/mg). |
|------------|----------------------------|---------------------|----------------------------------|
| Control    | 4463.44                    | 8.55                | 522.04 ± 77.92                   |
| Sub-lethal | 6002.92                    | 10.52               | 570.62 ± 190.46                  |
| Lethal     | 6190.82                    | 9.35                | 662.12 ± 134.63                  |

768

769

770 **Table 2.** Putative protein identification of GST isoforms from *F. hepatica* by MSMS.  
771 Peptide sequences from spots trypsin digested were used to search against both *F.*  
772 *hepatica* genomes for the identification of the specific members of the GST  
773 superfamily. MASCOT ion scores of >42 indicate identity or extensive homology  
774 ( $p < 0.05$ ). An accession number from Genbank relating to the top scoring BLAST hit  
775 to determine GST isoform is also reported. Changes in abundance (↑ or ↓) are  
776 denoted for spots responding to sub-lethal or lethal (SL or L) TCBZ-SO exposure for  
777 either purification method (GSH or Hex-GSH).

778

| Spot | Mas cot<br>Score                          | Genome Accession Number                     | Putative Identification           | GST BLAST         |                    |                      |                     |                       | Abundance<br>Change  |
|------|-------------------------------------------|---------------------------------------------|-----------------------------------|-------------------|--------------------|----------------------|---------------------|-----------------------|----------------------|
|      |                                           |                                             |                                   | Total<br>Peptides | Unique<br>Peptides | Sequence<br>Coverage | Accession<br>Number | Fasciola GST<br>Clade |                      |
| 1    | 243                                       | Maker-scaffold10x_490_pilon-snap-gene-0.8   | Glutathione S-transferase protein | 39                | 8                  | 28.5                 | ADP09370            | Mu 26/51              | -                    |
|      | 216                                       | D915_15048                                  | Glutathione S-transferase protein | 31                | 5                  | 25.6                 | THD18760            | Mu 27/47              | -                    |
|      | 209                                       | Maker-scaffold10x_1184_pilon-snap-gene-0.31 | Glutathione S-transferase protein | 26                | 5                  | 13                   | P31671              | Mu 28/7               | -                    |
|      | 225                                       | Maker-scaffold10x_1043_pilon-snap-gene-0.18 | Glutathione S-transferase protein | 21                | 5                  | 26.9                 | ABI79450            | S1                    | -                    |
|      | 62                                        | D915_11958                                  | Glutathione S-transferase protein | 16                | 8                  | 28                   | TPP64849            | Mu 29/1               | -                    |
| 2    | 125                                       | Maker-scaffold10x_490_pilon-snap-gene-0.8   | Glutathione S-transferase protein | 26                | 6                  | 21.2                 | ADP09370            | Mu 26/51              | -                    |
|      | 105                                       | D915_15048                                  | Glutathione S-transferase protein | 25                | 5                  | 25.6                 | THD18760            | Mu 27/47              | -                    |
|      | 100                                       | Maker-scaffold10x_1043_pilon-snap-gene-0.18 | Glutathione S-transferase protein | 21                | 5                  | 24.5                 | ABI79450            | S1                    | -                    |
|      | 173                                       | D915_11958                                  | Glutathione S-transferase protein | 10                | 5                  | 18                   | TPP64849            | Mu 29/1               | -                    |
|      | 92                                        | D915_13000                                  | Glutathione S-transferase protein | 9                 | 2                  | 12.4                 | THD20590            | Mu 28/7               | -                    |
| 49   | Maker-scaffold10x_61_pilon-snap-gene-0.52 | Tubulin-tyrosine ligase family protein      | 3                                 | 2                 | 4.8                | -                    | -                   | -                     |                      |
| 3    | 165                                       | Maker-scaffold10x_490_pilon-snap-gene-0.8   | Glutathione S-transferase protein | 48                | 9                  | 33.9                 | ADP09370            | Mu 26/51              | -                    |
|      | 154                                       | Maker-scaffold10x_490_pilon-snap-gene-0.5   | Glutathione S-transferase protein | 34                | 5                  | 31                   | P31670              | Mu 27/47              | -                    |
|      | 79                                        | D915_13000                                  | Glutathione S-transferase protein | 11                | 2                  | 12.4                 | THD20590            | Mu 28/7               | -                    |
| 4    | 421                                       | Maker-scaffold10x_490_pilon-snap-gene-0.8   | Glutathione S-transferase protein | 84                | 11                 | 37.7                 | ADP09370            | Mu 26/51              | -                    |
|      | 346                                       | Maker-scaffold10x_1184_pilon-snap-gene-0.31 | Glutathione S-transferase protein | 55                | 7                  | 14.6                 | P31671              | Mu 28/7               | -                    |
|      | 345                                       | Maker-scaffold10x_490_pilon-snap-gene-0.5   | Glutathione S-transferase protein | 60                | 6                  | 32.1                 | P31670              | Mu 27/47              | -                    |
|      | 67                                        | Maker-scaffold10x_2285_pilon-snap-gene-0.12 | Glutathione S-transferase protein | 6                 | 3                  | 16.8                 | THD21358            | Mu 29/1               | -                    |
| 5    | 1009                                      | Maker-scaffold10x_490_pilon-snap-gene-0.8   | Glutathione S-transferase protein | 165               | 15                 | 46.8                 | ADP09370            | Mu 26/51              | GSH SL ↑             |
|      | 769                                       | Maker-scaffold10x_1184_pilon-snap-gene-0.31 | Glutathione S-transferase protein | 114               | 12                 | 26.5                 | P31671              | Mu 28/7               | -                    |
|      | 859                                       | Maker-scaffold10x_490_pilon-snap-gene-0.5   | Glutathione S-transferase protein | 111               | 9                  | 47.1                 | P31670              | Mu 27/47              | -                    |
|      | 128                                       | D915_11958                                  | Glutathione S-transferase protein | 48                | 12                 | 36.7                 | TPP64849            | Mu 29/1               | -                    |
|      | 162                                       | D915_13524                                  | Hypothetical Protein              | 25                | 1                  | 25                   | -                   | -                     | -                    |
|      | 52                                        | Maker-scaffold10x_1043_pilon-snap-gene-0.18 | Glutathione S-transferase protein | 5                 | 3                  | 15.6                 | ABI79450            | S1                    | -                    |
| 61   | Maker-scaffold10x_61_pilon-snap-gene-0.52 | Tubulin-tyrosine ligase family protein      | 3                                 | 2                 | 5.5                | -                    | -                   | -                     |                      |
| 6    | 645                                       | Maker-scaffold10x_1184_pilon-snap-gene-0.31 | Glutathione S-transferase protein | 113               | 12                 | 28.9                 | P31671              | Mu 28/7               | -                    |
|      | 597                                       | Maker-scaffold10x_490_pilon-snap-gene-0.8   | Glutathione S-transferase protein | 112               | 12                 | 42.7                 | ADP09370            | Mu 26/51              | -                    |
|      | 643                                       | D915_15048                                  | Glutathione S-transferase protein | 90                | 9                  | 34.4                 | THD18760            | Mu 27/47              | -                    |
|      | 284                                       | D915_11958                                  | Glutathione S-transferase protein | 55                | 12                 | 34                   | TPP64849            | Mu 29/1               | -                    |
|      | 54                                        | Maker-scaffold10x_1043_pilon-snap-gene-0.18 | Glutathione S-transferase protein | 13                | 6                  | 30.2                 | ABI79450            | S1                    | -                    |
| 7    | 868                                       | D915_11958                                  | Glutathione S-transferase protein | 177               | 19                 | 55.7                 | TPP64849            | Mu 29/1               | GSH SL ↑             |
|      | 203                                       | Maker-scaffold10x_490_pilon-snap-gene-0.8   | Glutathione S-transferase protein | 64                | 11                 | 34.2                 | ADP09370            | Mu 26/51              | -                    |
|      | 210                                       | Maker-scaffold10x_1184_pilon-snap-gene-0.31 | Glutathione S-transferase protein | 59                | 10                 | 23.1                 | P31671              | Mu 28/7               | -                    |
|      | 192                                       | Maker-scaffold10x_490_pilon-snap-gene-0.5   | Glutathione S-transferase protein | 59                | 9                  | 54.5                 | P31670              | Mu 27/47              | -                    |
|      | 154                                       | Maker-scaffold10x_1043_pilon-snap-gene-0.18 | Glutathione S-transferase protein | 15                | 7                  | 46.2                 | ABI79450            | S1                    | -                    |
| 8    | No Significant hits                       |                                             |                                   |                   |                    |                      |                     |                       | -                    |
| 9    | 220                                       | Maker-scaffold10x_1184_pilon-snap-gene-0.31 | Glutathione S-transferase protein | 49                | 11                 | 23.1                 | P31671              | Mu 28/7               | -                    |
|      | 216                                       | D915_15048                                  | Glutathione S-transferase protein | 43                | 8                  | 35.6                 | THD18760            | Mu 27/47              | -                    |
|      | 189                                       | Maker-scaffold10x_2285_pilon-snap-gene-0.13 | Glutathione S-transferase protein | 35                | 7                  | 34.8                 | THD20842            | Mu 26/51              | -                    |
|      | 171                                       | D915_11958                                  | Glutathione S-transferase protein | 32                | 11                 | 31.7                 | TPP64849            | Mu 29/1               | -                    |
| 10   | 53                                        | Maker-scaffold10x_1043_pilon-snap-gene-0.18 | Glutathione S-transferase protein | 10                | 5                  | 25.9                 | ABI79450            | S1                    | -                    |
|      | 115                                       | D915_15048                                  | Glutathione S-transferase protein | 44                | 9                  | 44.4                 | THD18760            | Mu 27/47              | -                    |
|      | 106                                       | maker-scaffold10x_1184_pilon-snap-gene-0.31 | Glutathione S-transferase protein | 36                | 6                  | 13.7                 | P31671              | Mu 28/7               | -                    |
| 66   | D915_12658                                | Glutathione S-transferase protein           | 29                                | 6                 | 25.8               | THD20842             | Mu 26/51            | -                     |                      |
| 11   | 217                                       | Maker-scaffold10x_1043_pilon-snap-gene-0.18 | Glutathione S-transferase protein | 28                | 7                  | 33                   | ABI79450            | S1                    | -                    |
|      | 100                                       | maker-scaffold10x_490_pilon-snap-gene-0.8   | Glutathione S-transferase protein | 19                | 7                  | 25.9                 | ADP09370            | Mu 26/51              | -                    |
|      | 87                                        | D915_13000                                  | Glutathione S-transferase protein | 8                 | 2                  | 12.4                 | THD20590            | Mu 28/7               | -                    |
| 12   | 302                                       | Maker-scaffold10x_1043_pilon-snap-gene-0.18 | Glutathione S-transferase protein | 34                | 9                  | 39.2                 | ABI79450            | S1                    | -                    |
|      | 68                                        | Maker-scaffold10x_2285_pilon-snap-gene-0.13 | Glutathione S-transferase protein | 8                 | 2                  | 10.3                 | THD20842            | Mu 26/51              | -                    |
|      | 51                                        | D915_13000                                  | Glutathione S-transferase protein | 4                 | 1                  | 7.1                  | THD20590            | Mu 28/7               | -                    |
| 13   | 439                                       | Maker-scaffold10x_490_pilon-snap-gene-0.8   | Glutathione S-transferase protein | 86                | 14                 | 39.2                 | ADP09370            | Mu 26/51              | -                    |
|      | 401                                       | Maker-scaffold10x_1184_pilon-snap-gene-0.31 | Glutathione S-transferase protein | 63                | 13                 | 26.2                 | P31671              | Mu 28/7               | -                    |
|      | 419                                       | Maker-scaffold10x_490_pilon-snap-gene-0.5   | Glutathione S-transferase protein | 63                | 8                  | 47.1                 | P31670              | Mu 27/47              | -                    |
|      | 111                                       | Maker-scaffold10x_1043_pilon-snap-gene-0.18 | Glutathione S-transferase protein | 28                | 10                 | 49.5                 | ABI79450            | S1                    | -                    |
|      | 130                                       | D915_11958                                  | Glutathione S-transferase protein | 25                | 9                  | 29.3                 | TPP64849            | Mu 29/1               | -                    |
| 14   | 98                                        | Maker-scaffold10x_2285_pilon-snap-gene-0.12 | Glutathione S-transferase protein | 12                | 5                  | 24.1                 | THD21358            | Mu 29/1               | HexGSH SL ↓<br>L ↓ ↓ |

# S-Hexyl GSH Affinity

pH3 → 10

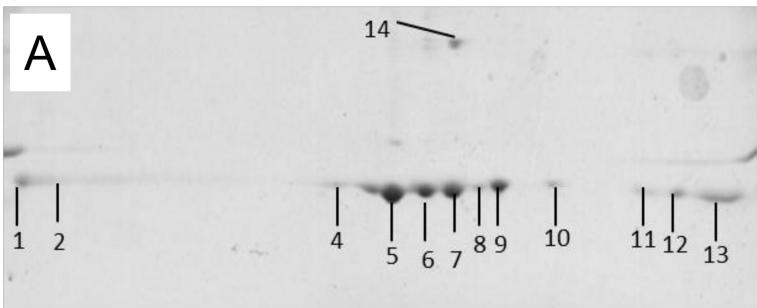

# GSH Affinity

pH3 → 10

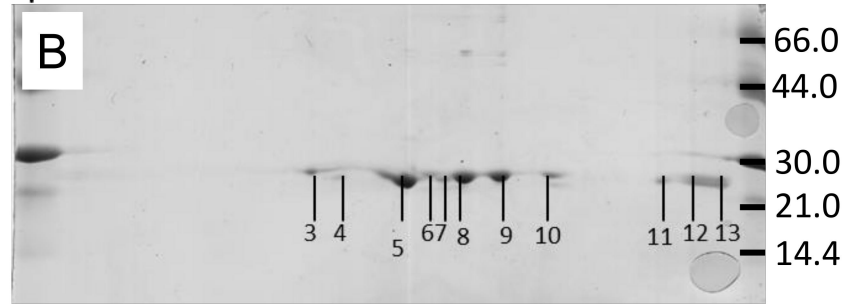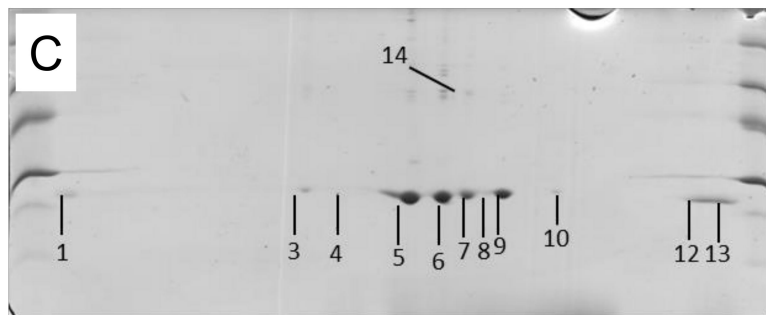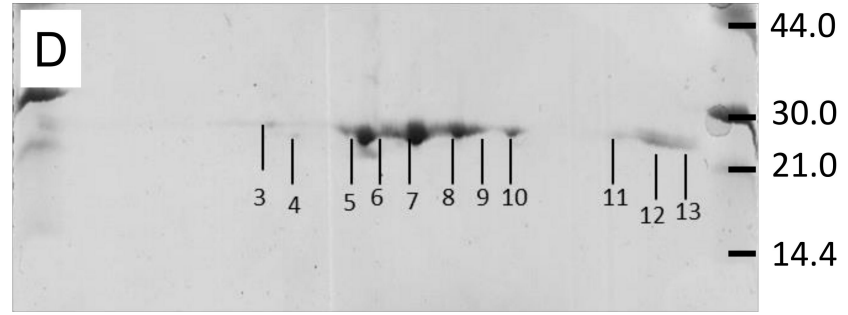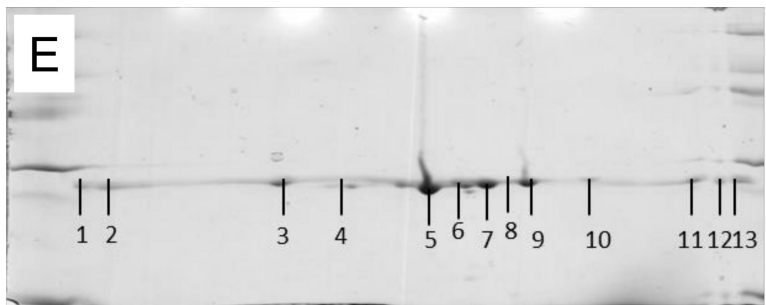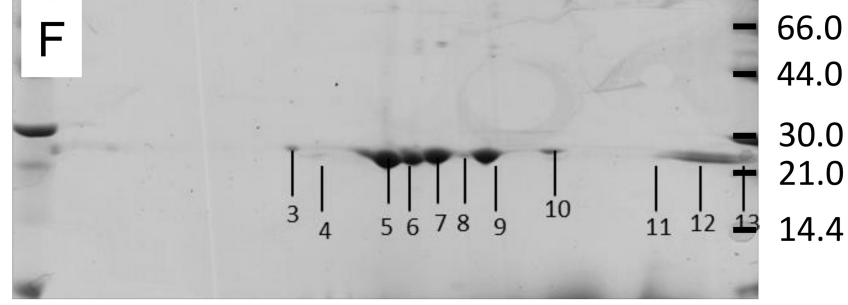

pH 3 Mu → 10

Cytosolic

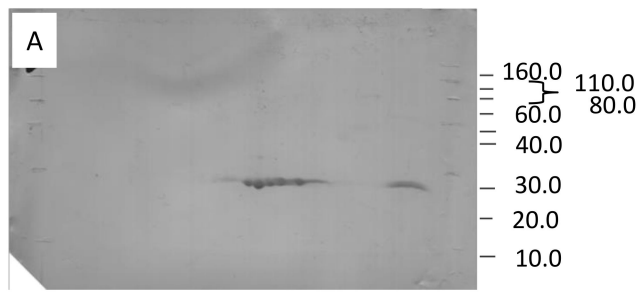

GSH

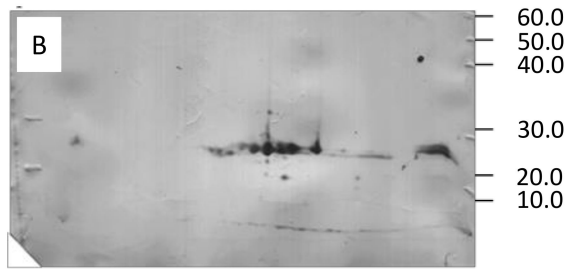

S-Hex

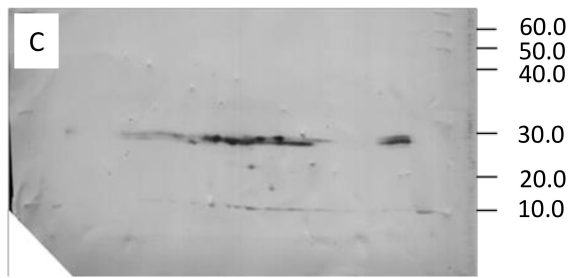

A)

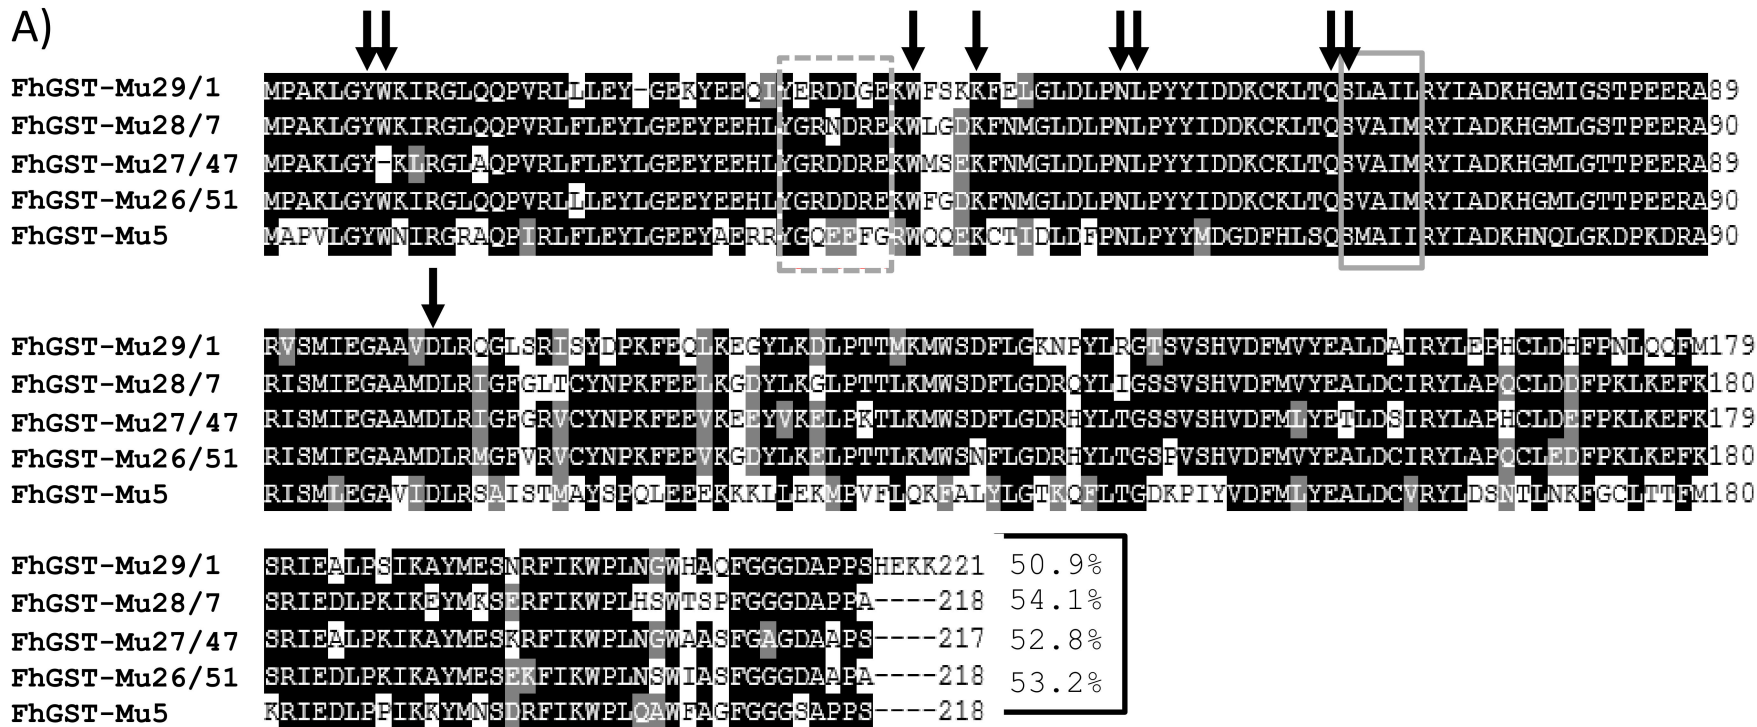

B)

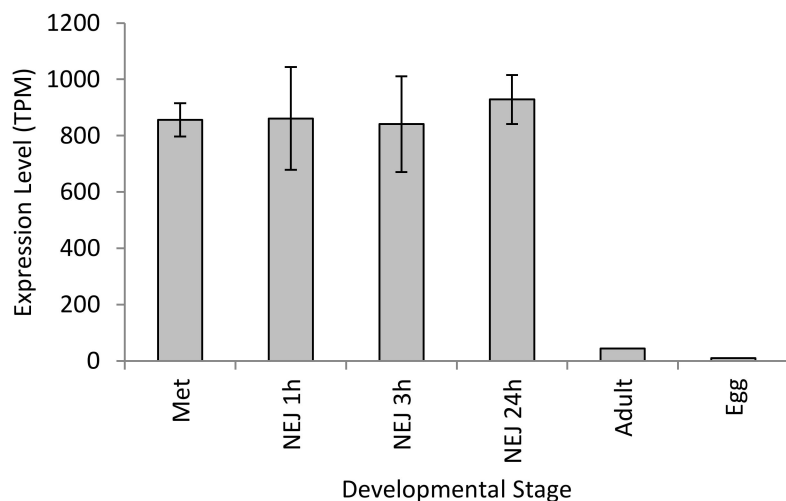

C)

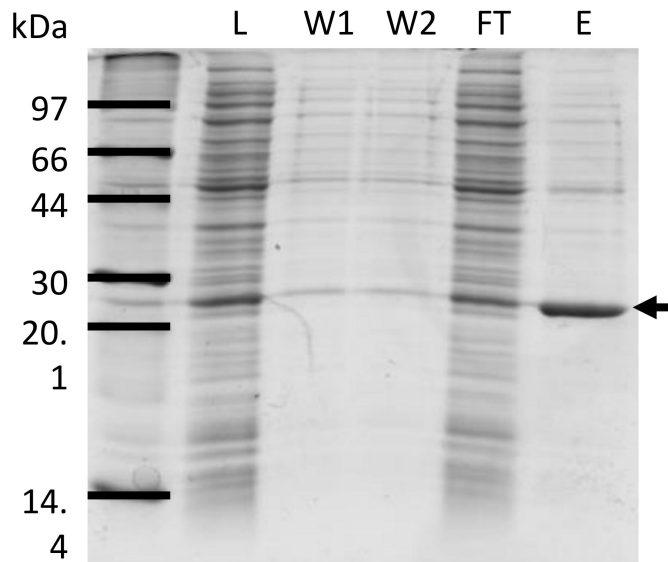

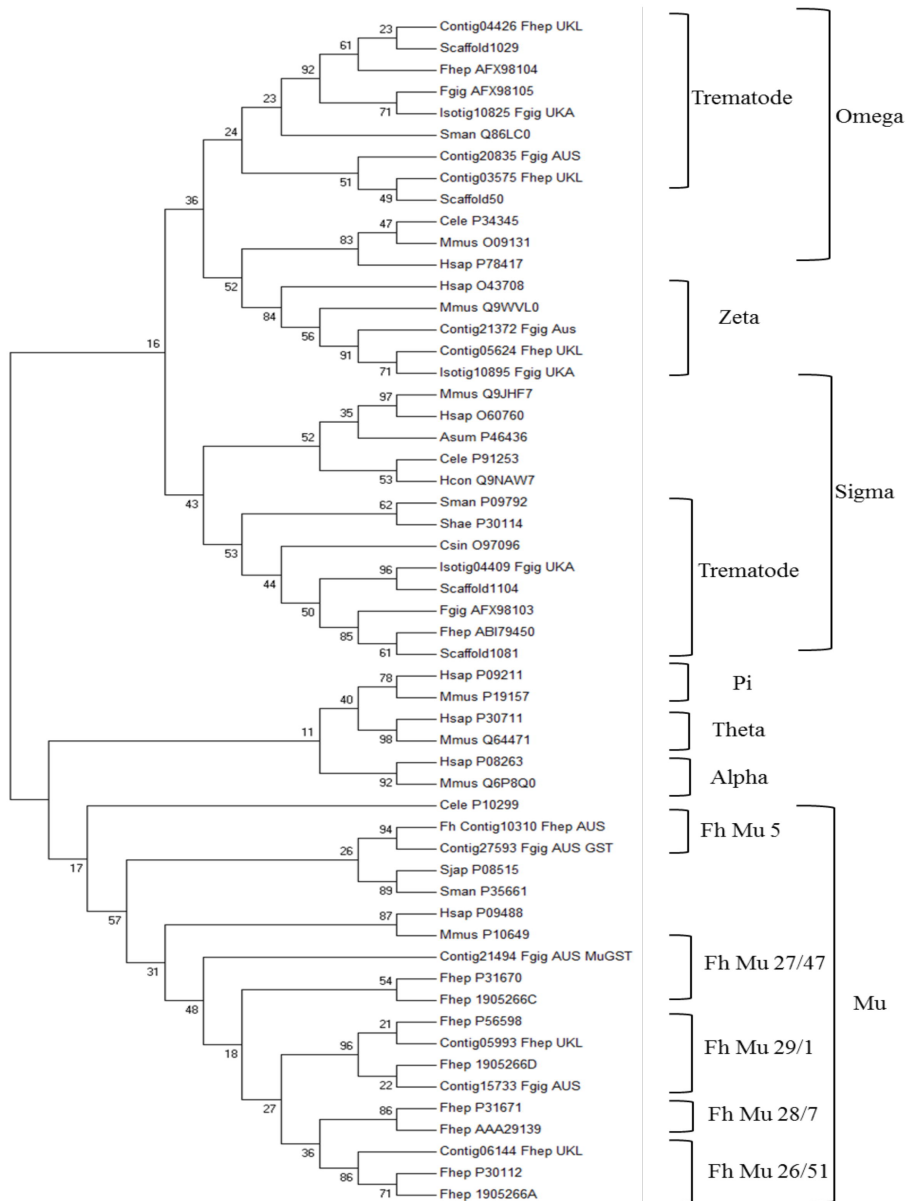

Source: https://www.biorxiv.org/content/10.1101/2020.07.22.213892v1.full.pdf
